# Supplementary material for: Humic acid removal by gas–liquid interface discharge plasma: performance, mechanism and comparison to ozonation
Source: Royal Society of Chemistry journal article supplement (doi:10.1039/c8ew00520f), 2018-11-16
Supplement: c8ew00520f1.pdf [file c8ew00520f1.pdf]

## Supporting Information

### Humic acid removal by gas-liquid interface discharge plasma: performance, mechanism and comparison to ozonation

Yanyan Cui<sup>a, b</sup>, Jianwei Yu<sup>a, d\*</sup>, Ming Su<sup>a,d</sup>, Zeyu Jia<sup>a,d</sup>, Tingting Liu<sup>a,d</sup>, Gaku Oinuma<sup>c</sup>, Tokiko Yamauchi<sup>c</sup>

<sup>a</sup> Key Laboratory of Drinking Water Science and Technology, Research Center for Eco-Environmental Sciences, Chinese Academy of Sciences, Beijing, 100085, China;

<sup>b</sup> China university of Mining & Technology, Beijing, 100083, China;

<sup>c</sup> Advanced Technology R&D Center, Mitsubishi Electric Corporation, Hyogo, Japan;

<sup>d</sup> University of Chinese Academy of Sciences, Beijing 100049, China.

#### Corresponding Author:

Jianwei Yu, Tel: 86-10-62849149; Fax: 86-10-62923541; E-mail: [jwyu@rcees.ac.cn](mailto:jwyu@rcees.ac.cn)

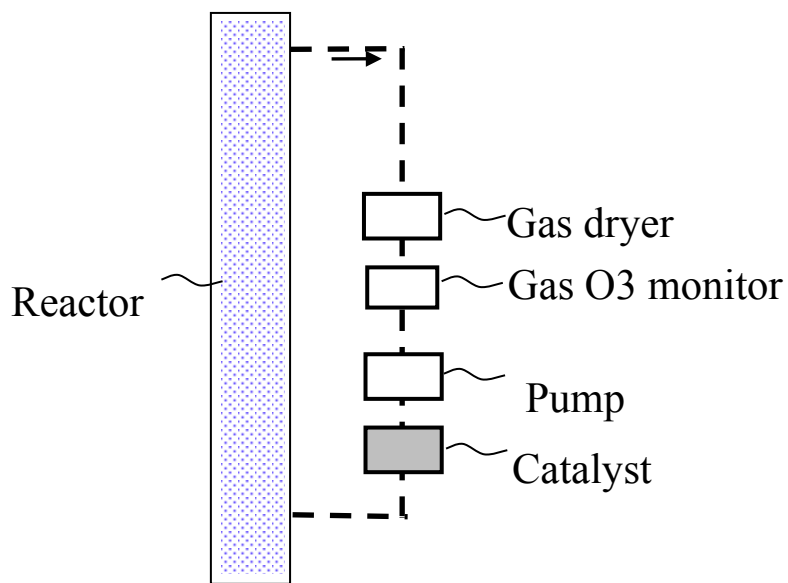

**Fig. S1** Schematic diagram of the experimental apparatus with ozone decomposing catalyst

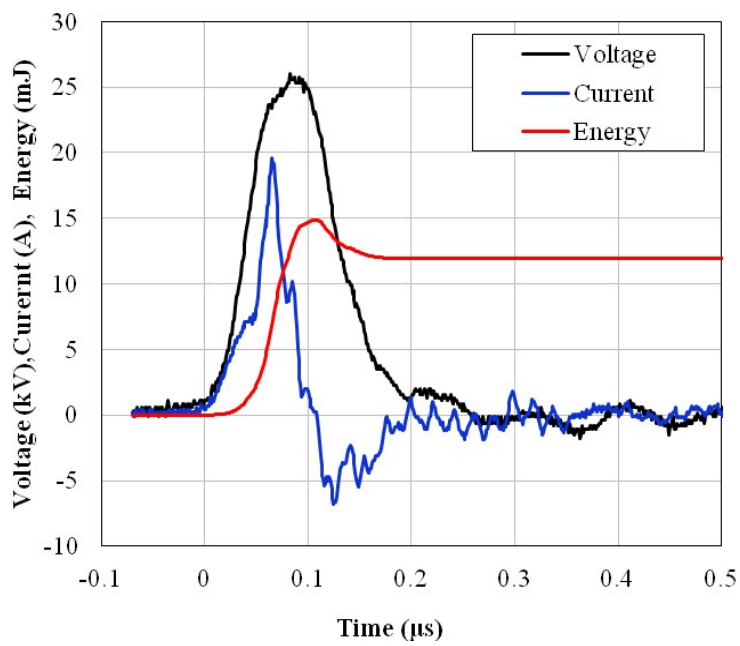

(a)

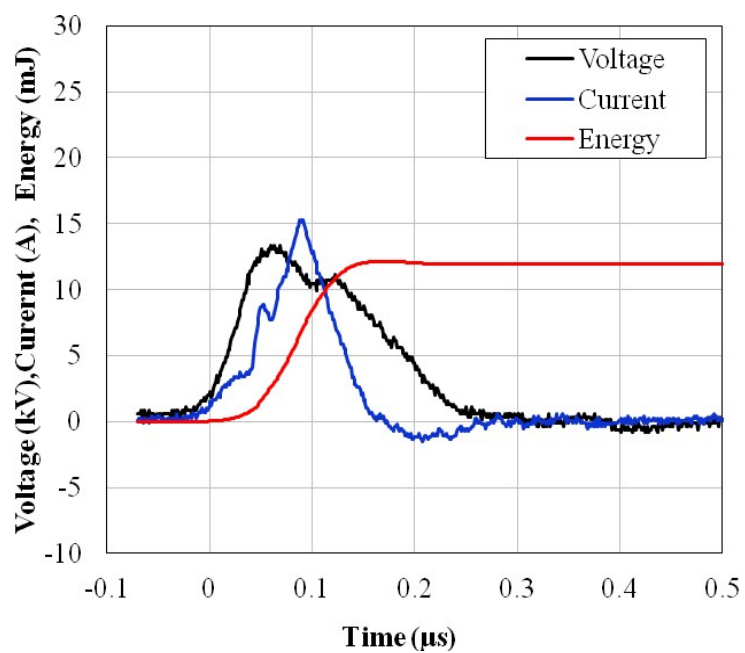

(b)

**Fig. S2** Typical waveforms of pulse voltage, discharge current, and discharge energy in the pure carrier gas of (a)  $\text{O}_2$  and (b) Ar (discharge conditions: 500pps, 12mj/pulse, 6W)

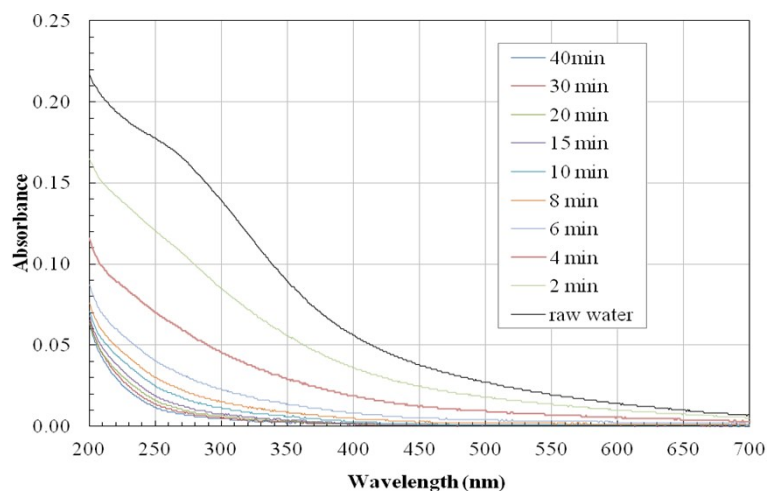

(a)

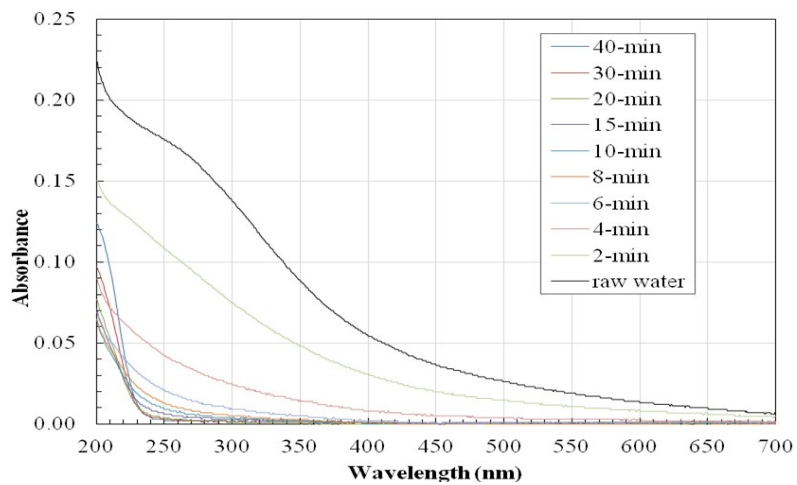

(b)

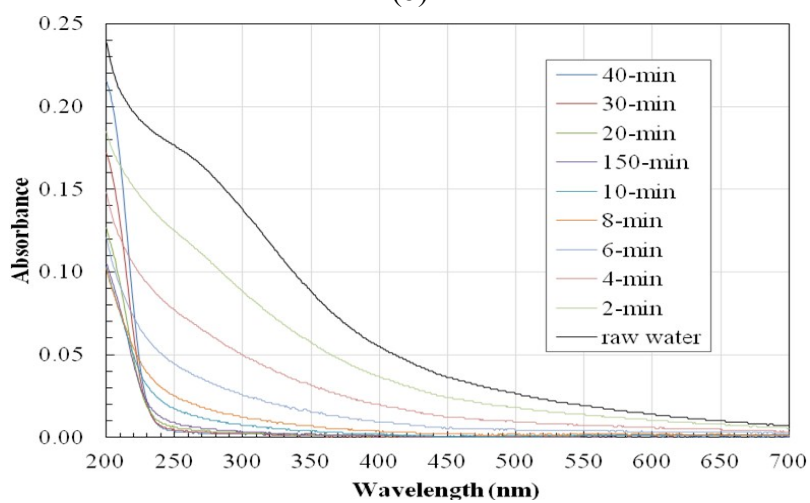

(c)

**Fig.S3** UV/Vis absorbance of HA during ozonatin treatment (a) and plasma without catalyst (b) and with catalyst (c)
